# Supplementary material for: Difluoroboron β-diketonate materials with long-lived phosphorescence enable lifetime based oxygen imaging with a portable cost effective camera
Source: Royal Society of Chemistry journal article supplement (doi:10.1039/c5ay02959g), 2016-01-01
Supplement: c5ay02959g1.pdf [file c5ay02959g1.pdf]

# Difluoroboron $\beta$ -Diketonate Materials with Long-Lived Phosphorescence Enable Lifetime Based Oxygen Imaging with a Portable Cost Effective Camera

Alexander S. Mathew, Christopher A. DeRosa, James N. Demas, Cassandra L. Fraser\*

Department of Chemistry, University of Virginia, Charlottesville, Virginia 22904

## **Supporting Information**

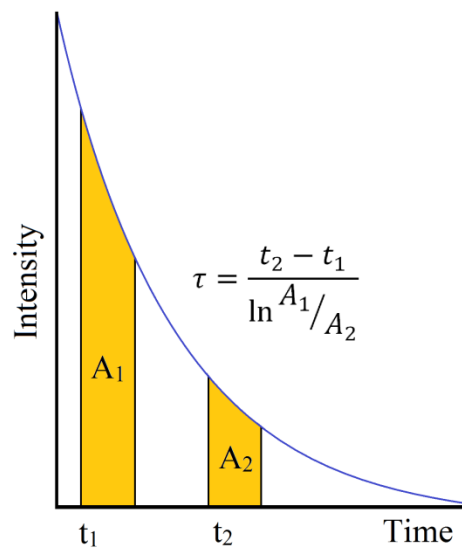

**Figure S1.** An illustration of how Rapid Lifetime Determination (RLD) is computed. The blue line shows a typical decay and the yellow shaded regions represent integrated regions,  $A_1$  and  $A_2$ , bounded by times  $t_1$  and  $t_2$ .

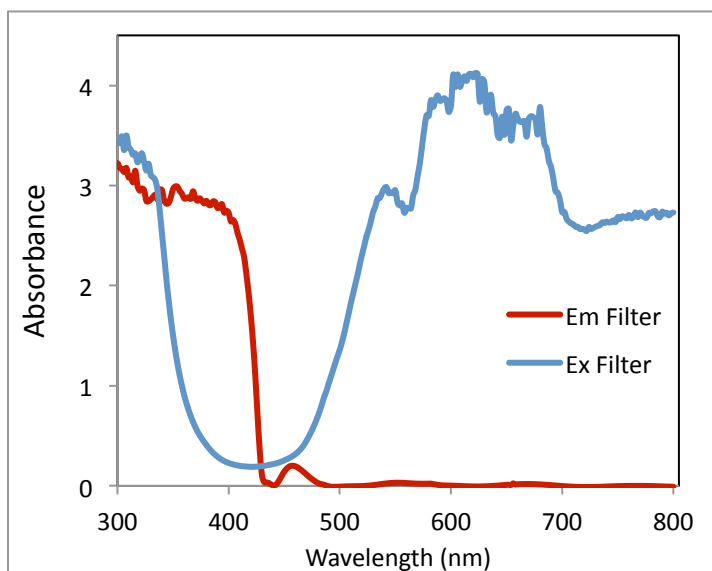

**Figure S2.** Absorbance spectra of emission and excitation filters.

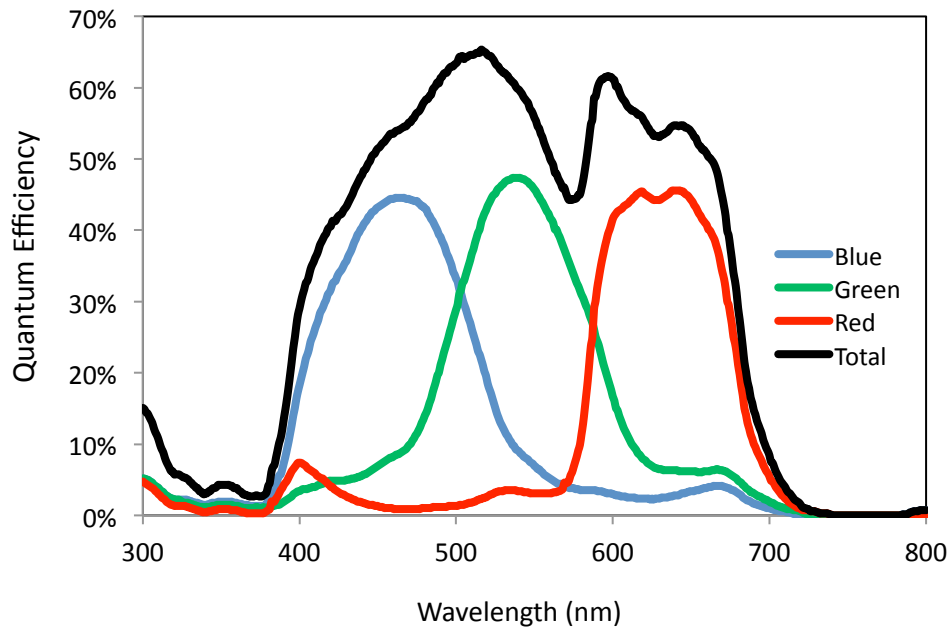

**Figure S3.** Quantum efficiency plot of all color channels of the PGR GS3-U3-41C6C-C camera. Total emission is determined by summing all three channel intensities. Adapted from <http://www.ptgrey.com/>.

**Table S1.** Rationale and Cost of Hardware Components.

| <b>Component</b>                      | <b>Rationale</b>                                                                                                                                                                                                                                                                                                                          | <b>Cost</b>          |
|---------------------------------------|-------------------------------------------------------------------------------------------------------------------------------------------------------------------------------------------------------------------------------------------------------------------------------------------------------------------------------------------|----------------------|
| PGR Grasshopper3 CMOS Camera          | This camera is ideal for a simple, portable, and reliable imaging device. Performance specifications (2048x2048 max resolution, 2000 FPS at reduced resolution, ~50% quantum efficiency) were excellent at this price. Further the camera is small and can transmit data and power through a single USB 3.0 cable, maximizing simplicity. | \$1200               |
| Spacecom f/0.95 50 mm lens            | Imaging at high framerates results in fewer photons reaching the camera sensor per frame. To compensate, this fast lens was chosen.                                                                                                                                                                                                       | \$800                |
| Yongnou 560-II Flash Unit             | This flash unit (normally used for photography) can reproduce very fast pulses compared to the lifetimes of our dyes. The brightness and frequency of these pulses is adjustable. The unit is inexpensive and portable and operates on battery power.                                                                                     | \$60                 |
| Esco Optics 425 nm bandpass filter    | This filter blocks most of the broad emission of the flash unit while passing a range of wavelengths sufficient to excite most of the boron dyes, thus reducing noise.                                                                                                                                                                    | \$100                |
| Edmund Optics 425 nm long pass filter | This filter suppresses most of the excitation light while passing the emissions of most of the boron dyes.                                                                                                                                                                                                                                | \$100                |
| Lenovo w530 Laptop                    | A computer was needed to process and display data. A laptop was chosen for portability. The following components were necessary to accommodate the large data output of the camera:<br>Intel Core i7-3940XM processor<br>32 GB RAM<br>Intel 180 GB solid state drive<br>NVIDIA Quadro K2000M graphics card<br>USB 3.0 Ports               | \$2700               |
|                                       |                                                                                                                                                                                                                                                                                                                                           | <b>Total: \$4960</b> |

```

1.  %Delete any pre-existing camera connections
2.  delete(imaqfind)
3.
4.  %%Specify resolution
5.  str={'RW08_160x120','RW08_320x240','RW08_640x480',...
6.      'RW08_800x600','RW08_1024x768','RW08_1280x960','RW08_1600x1200','RW08_2048x2048'};
7.  sel = listdlg('PromptString','Select a resolution:','SelectionMode','single','ListString',str);
8.
9.  %%Gain control of camera and ensure correct parameters
10. vidobj = videoinput('winvideo',3,char(str(sel)));
11. src = getselectedsource(vidobj);
12. src.ExposureMode='manual';
13. src.GainMode='manual';
14. src.Brightness=0;
15. Exposurevals=propinfo(src,'Exposure');
16. src.Exposure=max(Exposurevals.ConstraintValue);
17. src.Gain=0;
18. src.Gamma=100;
19. vidobj.BayerSensorAlignment='gbrg';
20. vidobj.ReturnedColorSpace='bayer';
21. triggerconfig(vidobj, 'manual');
22. framerate=str2num(get(src,'FrameRate'));
23. start(vidobj);
24.
25. %preallocate
26. maxLife=.213;
27. minLife=0;
28. vidRes = get(vidobj, 'VideoResolution');
29. imageRes = flipr(vidRes);
30. mapframes=zeros(imageRes(1),imageRes(2),3,2);
31.
32. %Create a image object for background acquisition
33. H=imshow(zeros(imageRes(1),imageRes(2),3));
34.
35. %Create UI buttons to start and stop imaging
36. btnBR = uicontrol('Style','pushbutton','String','Take BR',...
37.     'Position',[100 350 100 50],...
38.     'Callback','H.AlphaData=2;');
39.
40. btnStart = uicontrol('Style','pushbutton','String','Start',...
41.     'Position',[100 300 100 50],...
42.     'Callback','H.AlphaData=3;');
43.
44. while true
45.     switch H.AlphaData
46.         case 1
47.             %preview the stream to take a background image until Start
48.             set(H,'CData',getsnapshot(vidobj));
49.             drawnow
50.         case 2
51.             %store the background image
52.             br=getsnapshot(vidobj);
53.             H.AlphaData=1;
54.         case 3
55.             %close background panel and begin imaging
56.             close all
57.             break
58.     end
59. end
60.
61. %Create a scaled image object bounded by max and min lifetimes
62. J=imagesc(zeros(imageRes(1),imageRes(2)),[minLife,maxLife]);

```

```
63. map=colormap(jet(256));
64. btnStop = uicontrol('Style', 'pushbutton', 'String', 'Stop',...
65.     'Position', [100 330 50 20],...
66.     'Callback', 'J.AlphaData=2;');
67.
68. %begin RLD imaging
69. while true
70.     switch J.AlphaData
71.         case 1
72.             %Scan for excitation pulse
73.             if mean2(getsnapshot(vidobj))>150
74.
75.                 %capture 2 consecutive frames and subtract the background frame
76.                 mapframes(:,:,1)=getsnapshot(vidobj)-br;
77.                 mapframes(:,:,2)=getsnapshot(vidobj)-br;
78.
79.                 %perform RLD pixel-wise using the green channel
80.                 frame=(1/framerate)./(log(mapframes(:,:,2,1)./mapframes(:,:,2,2)));
81.
82.                 %NOTE AN OXYGEN CALIBRATION FUNCTION IS APPLIED HERE GIVEN BY F
83.                 %frame=F(frame);
84.
85.                 %Display and update
86.                 set(J,'CData',frame);
87.                 drawnow;
88.                 end
89.                 case 2
90.                     break
91.                 end
92.             end
93.
94. stop(vidobj);
95. close all
```

**Figure S4.** RLD MATLAB Code

## Sensor Linearity

Sensor linearity was determined by monitoring the output intensity of a uniformly illuminated white sheet of paper. The signal was recorded and then attenuated by applying combinations of photographic neutral density filters. Intensities were determined by averaging 8 bit values across the entire sensor for each of the color channels and summed over all channels for 20 frames.

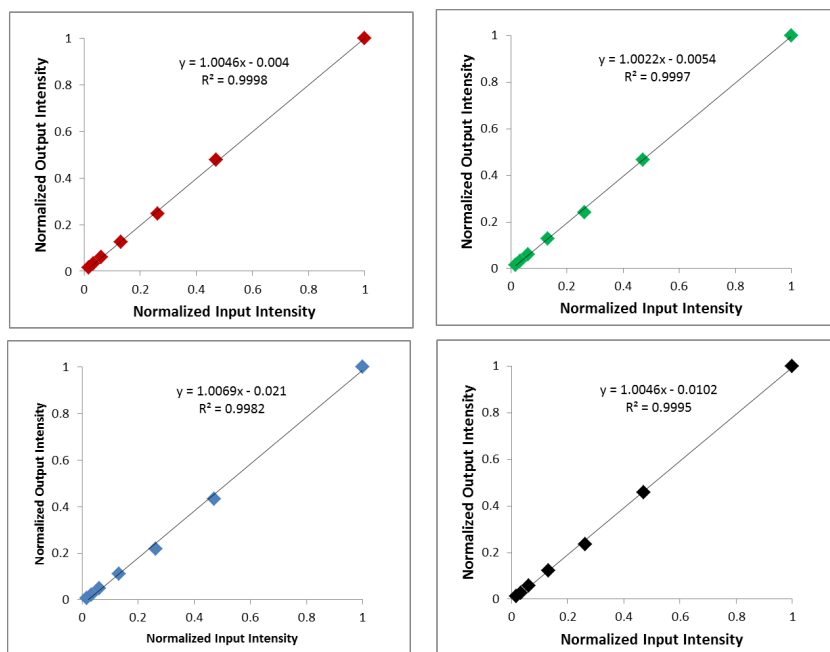

**Figure S5.** Linearity of red (top left), green (top right), and blue (bottom left) channels as well as total emission (bottom right).

**Table S2.** Optimal RLD Parameters for Selected Dyes.

| Dye | $t_1$ (ms) | $t_2$ (ms) |
|-----|------------|------------|
| 1   | 99         | 154        |
| 2   | 44         | 110        |
| 3   | 66         | 132        |
| 4   | 44         | 110        |

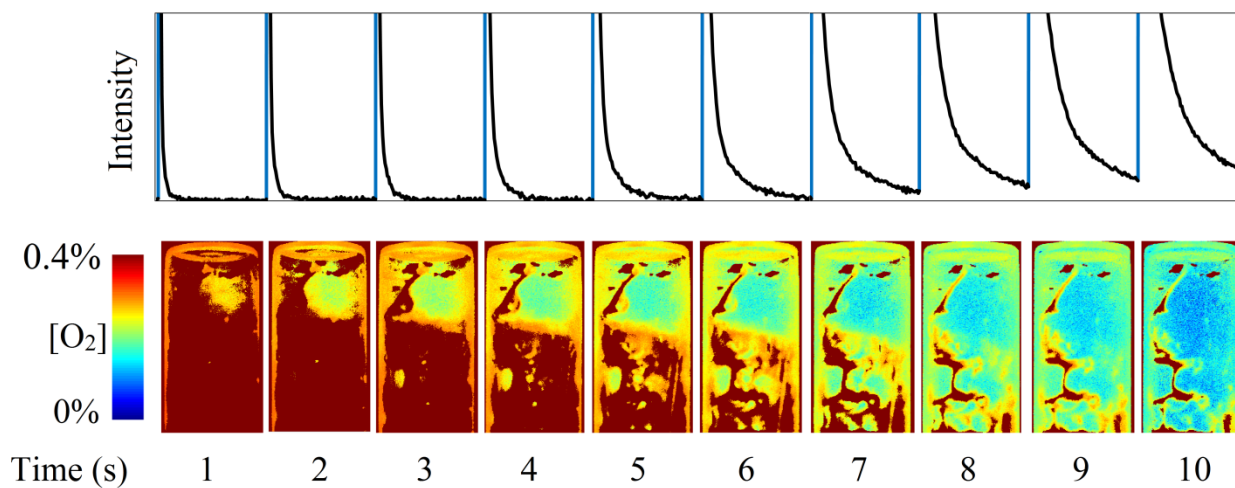

**Figure S6.** RLD imaging of nitrogen stream purging a vial containing a film of sample 2 over time. Intensity plots of an ROI (perceived excitation in blue, sample decay in black) are shown above corresponding colormaps. Here we demonstrate increased temporal resolution with pulses only 1 s apart.
